# Supplementary material
Source: MDPI journal article supplement (https://www.mdpi.com/2071-1050/12/1/144)
Supplement: s1 [file s1]

## Supplementary Material 2: Code system, codes per interview (I1-I34, MAXQDA) and information about the interviewees

| Code System                                     |  |       |
|-------------------------------------------------|--|-------|
| Code System                                     |  | 1,489 |
| Arguments and reasons to use MON810             |  | 84    |
| Break with (agricultural and social) status quo |  | 136   |
| Coexistence (explicitly addressed)              |  | 43    |
| Discursive dimension of conflicts               |  | 154   |
| Future of agriculture                           |  | 123   |
| Individualization                               |  | 74    |
| Legality vs. legitimacy                         |  | 35    |
| Local conflicts and impacts on the local        |  | 213   |
| Local vs. external actors                       |  | 209   |
| Material dimension of conflicts                 |  | 101   |
| Politization and (personal) empowerment ...     |  | 78    |
| Productive vs. destructive dimension of conf... |  | 18    |
| Social and economic relations and depende...    |  | 221   |
| Sets                                            |  | 0     |

| Code System                                       | I1 | I2 | I3 | I4 | I5 | I6 | I7 | I8 | I9 | I10 | I11 | I12 | I13 | I14 | I15 | I16 | I17 | I18 | I19 | I20 | I21 | I22 | I23 | I24 | I25 | I26 | I27 | I28 | I29 | I30 | I31 | I32 | I33 | I34 |
|---------------------------------------------------|----|----|----|----|----|----|----|----|----|-----|-----|-----|-----|-----|-----|-----|-----|-----|-----|-----|-----|-----|-----|-----|-----|-----|-----|-----|-----|-----|-----|-----|-----|-----|
| Arguments and reasons to use MON810               | ■  |    |    |    |    | ■  |    |    |    |     |     |     |     |     |     |     |     |     |     |     |     |     |     |     |     | ■   |     |     |     |     |     |     |     |     |
| Break with (agricultural and social) status quo   |    |    |    |    | ■  |    |    |    |    |     |     | ■   |     | ■   |     |     |     | ■   |     |     | ■   |     |     |     |     |     |     |     |     | ■   | ■   |     |     |     |
| Coexistence (explicitly addressed)                |    |    |    |    |    |    |    |    |    |     | ■   |     |     |     |     |     |     |     |     |     |     |     |     |     |     |     |     |     |     |     |     |     |     |     |
| Discursive dimension of conflicts                 |    |    | ■  | ■  |    |    |    |    |    |     |     |     |     |     |     |     |     |     |     |     |     |     |     |     |     |     |     |     |     |     |     |     |     |     |
| Future of agriculture                             |    |    |    |    |    |    |    |    |    |     |     |     |     |     |     |     |     |     |     |     |     |     |     |     |     |     |     |     |     |     |     |     |     |     |
| Individualization                                 |    |    |    |    |    |    |    |    |    |     |     |     |     |     |     |     |     |     |     |     |     |     |     |     |     |     |     |     |     |     |     |     |     |     |
| Legality vs. legitimacy                           |    |    |    |    |    |    |    |    |    |     |     |     |     |     |     |     |     |     |     |     |     |     |     |     |     |     |     |     |     |     |     |     |     |     |
| Local conflicts and impacts on the local          |    |    |    |    |    |    |    |    |    |     |     |     |     |     |     |     |     |     |     |     |     |     |     |     |     |     |     |     |     |     |     |     |     |     |
| Local vs. external actors                         |    |    |    |    |    |    |    |    |    |     |     |     |     |     |     |     |     |     |     |     |     |     |     |     |     |     |     |     |     |     |     |     |     |     |
| Material dimension of conflicts                   |    |    |    |    |    |    |    |    |    |     |     |     |     |     |     |     |     |     |     |     |     |     |     |     |     |     |     |     |     |     |     |     |     |     |
| Politization and (personal) empowerment ...       |    |    |    |    |    |    |    |    |    |     |     |     |     |     |     |     |     |     |     |     |     |     |     |     |     |     |     |     |     |     |     |     |     |     |
| Productive vs. destructive dimension of conflicts |    |    |    |    |    |    |    |    |    |     |     |     |     |     |     |     |     |     |     |     |     |     |     |     |     |     |     |     |     |     |     |     |     |     |
| Social and economic relations and dependencies    | ■  |    | ■  |    |    |    | ■  | ■  |    | ■   | ■   | ■   | ■   | ■   |     | ■   |     | ■   | ■   |     | ■   |     | ■   |     |     |     | ■   |     | ■   |     |     |     | ■   | ■   |

**Interviewees Landkreis Kitzingen (9m, 4f):**

- 1 beekeeper
- 1 farm shop owner
- 1 journalist
- 1 mayor
- 3 farmers not using GMOs (2 of them organic farmers)
- 3 farmers using or planning to use MON810
- 3 regional GMO opponents

**Interviewees Landkreis Oberhavel (8m, 2f):**

- 1 member of the Left Party
- 1 person providing infrastructure for the protests
- 2 regional GMO opponents
- 6 farmers using or planning to use MON810

**Interviewees Landkreis Lüchow-Dannenberg (4m, 2f):**

- 1 farmer not using GMOs
- 1 representative of a seed company
- 2 farmers using or planning to use MON810
- 2 regional GMO opponents (with one of them 2 interviews were conducted)

**Other interviewees (1m, 3f):**

- 1 anti GMO activist (national and international level)
- 1 representative of Arbeitsgemeinschaft bäuerliche Landwirtschaft (AbL)
- 1 representative of Gendreck weg
- 1 representative of InnoPlanta
