# Supplementary material
Source: MDPI journal article supplement (https://www.mdpi.com/2071-1050/12/1/144)
Supplement: s1 [file s1]

### Supplementary Material 3: List of documents (NBT conflicts in the UK and Germany)

- 1) Arbeitsgemeinschaft bäuerliche Landwirtschaft (AbL): „EuGH-Urteil zu neuer Gentechnik bietet Rechtssicherheit, Wahlfreiheit und sichert die gentechnikfreie Erzeugung“, [https://www.abl-ev.de/apendix/news/details/?tx\\_ttnews%5Btt\\_news%5D=2580&cHash=1776449a357d1a397bf581607214ec2a](https://www.abl-ev.de/apendix/news/details/?tx_ttnews%5Btt_news%5D=2580&cHash=1776449a357d1a397bf581607214ec2a) (together with IG Saatgut), published: 24 July 2019.
- 2) Arbeitsgemeinschaft bäuerliche Landwirtschaft (AbL): „Recht auf eine gentechnikfreie Landwirtschaft sichern“, <https://www.abl-ev.de/themen/gentechnikfrei/>, last access: 22 November 2019.
- 3) Beyond GM and GM Freeze: “Sign the petition!”, [https://donthide.gmfreeze.org/?petition\\_origin=beyondgm](https://donthide.gmfreeze.org/?petition_origin=beyondgm), 2019, last access: 22 November 2019.
- 4) Beyond GM: “Good food makes everything better”, <https://beyond-gm.org/wp-content/uploads/2015/12/GMO.pdf>, published: 2015.
- 5) Bundesverband Ökologische Lebensmittelwirtschaft (BÖLW): “BÖLW-Kommentar zum EuGH-Urteil über neue Gentechnik vor einem Jahr“, <https://www.boelw.de/news/boelw-kommentar-zum-eugh-urteil-ueber-neue-gentechnik-vor-einem-jahr/>, published: 24 July 2019.
- 6) Bundesverband Ökologische Lebensmittelwirtschaft (BÖLW): “Gentechnik als Gentechnik regulieren“, <https://www.boelw.de/themen/gentechnik/landwirtschaft/artikel/gentechnik-als-gentechnik-regulieren/>, published: 7 June 2019
- 7) British Society of Plant Breeders (BSPB): Journal “Plant Breeding Matters”, [http://www.bspb.co.uk/BSPB\\_Plant\\_Breeding\\_Matters\\_Autumn\\_2018.pdf](http://www.bspb.co.uk/BSPB_Plant_Breeding_Matters_Autumn_2018.pdf), published: Autumn 2018.
- 8) Bund für Umwelt und Naturschutz Deutschland (BUND): <https://www.bund.net/service/presse/pressemitteilungen/detail/news/wahlfreiheit-und-vorsorge-sichern-21-verbaende-fordern-mit-resolution-die-regulierung-und-kennzeichnen/>, published: 3 July 2018.
- 9) Bund für Umwelt und Naturschutz Deutschland (BUND): <https://www.bund.net/service/presse/pressemitteilungen/detail/news/kommentar-verbraucherkonferenz-genome-editing-bmel-und-bfr-muessen-kritische-fragen-und-anmerkungen/>, published: 30 September 2019.
- 10) George Eustice, Minister of State at the Department for Environment, Food and Rural Affairs (Defra), cited in the following document: [http://www.bspb.co.uk/BSPB\\_Plant\\_Breeding\\_Matters\\_Autumn\\_2018.pdf](http://www.bspb.co.uk/BSPB_Plant_Breeding_Matters_Autumn_2018.pdf), Autumn 2018.
- 11) Deutscher Bauernverband (DBV): „Positionierung des Deutschen Bauernverbandes zu den neuen Züchtungsmethoden im pflanzlichen Bereich“, <http://media.repro-mayr.de/17/710017.pdf>, published: 6 December 2017.
- 12) Deutscher Bauernverband (DBV): „Bauernverband zum Urteil zu neuen Züchtungsmethoden“, <https://mobil.bauernverband.de/bauernverband-zum-urteil-zu-neuen-zuechtungsmethoden>, 25 July 2018.
- 13) Friends of the Earth: “Gene-edited organisms in agriculture: Risks and unexpected consequences”, [https://foe.org/wp-content/uploads/2018/09/FOE\\_GenomeEditingAgReport\\_final.pdf](https://foe.org/wp-content/uploads/2018/09/FOE_GenomeEditingAgReport_final.pdf), published September 2018.
- 14) Gen-ethisches Netzwerk (GeN): “Genome Editing. Heilsversprechen Präzision“, <https://shop.gen-ethisches-netzwerk.de/faltblatt/38-genome-editing-flyer.html>, published: June 2017.
- 15) GeneWatch: “GeneWatch UK response to the Nuffield Council on Bioethics’ Call for Evidence on Genome Editing and Farmed Animals“, [http://www.genewatch.org/uploads/f03c6d66a9b354535738483c1c3d49e4/GeneWatch\\_UK\\_response\\_to\\_the\\_Nuffield\\_Council\\_on\\_Bioethics\\_fin.pdf](http://www.genewatch.org/uploads/f03c6d66a9b354535738483c1c3d49e4/GeneWatch_UK_response_to_the_Nuffield_Council_on_Bioethics_fin.pdf), published: September 2019.

- 16) GM Freeze: "Safeguard our Farms", <https://www.gmfreeze.org/safeguard/>, last updated: last updated 29 October 2019.
- 17) GM Freeze: "ECJ rules in favour of tough regulation for new GM techniques", <https://www.gmfreeze.org/press-releases/4966/>, published: 25 July 2018.
- 18) GM watch: "Coming to your dinner plate soon? Did you think GM crops and foods had pretty much gone away in Europe? Now they're set to return.", <https://gmwatch.org/en/news/latest-news/18984>, published: 17 June 2019.
- 19) The Federal Government, Germany: "Europäischer Gerichtshof urteilt: Strenge Vorgaben für Gentechnik-Verfahren", <https://www.bundesregierung.de/breg-de/suche/strenge-vorgaben-fuer-gentechnik-verfahren-1517256>, published: 25. July 2018.
- 20) Government, UK, Boris Johnson's first three speeches: 1) <https://www.gov.uk/government/speeches/boris-johnsons-first-speech-as-prime-minister-24-july-2019> (24 July 2019), 2) <https://www.gov.uk/government/speeches/pm-statement-on-priorities-for-the-government-25-july-2019> (25 July 2019), 3) <https://www.gov.uk/government/speeches/pm-speech-at-manchester-science-and-industry-museum> (27 July 2019)
- 21) IFOAM/Organics international: "Genetically Modified Organisms (GMOs) and new genetic engineering techniques", <https://www.ifoam.bio/pt/what-we-do/gmos>, last access: 22 November 2019.
- 22) Informationsdienst Gentechnik, „Dossier Neue Gen-Techniken“, <https://www.keine-gentechnik.de/dossiers/neue-technologien/>, last access: 22 November 2019.
- 23) InnoPlanta: "Änderungsbedarf beim Gentechnikgesetz", <https://www.innoplanta.de/>, last access: 22 November 2019.
- 24) KWS: "Genome Editing - neue Technik mit vielen Möglichkeiten", <https://www.kws.com/de/de/innovation/zuechtungsmethoden/genome-editing/>, last access: 22 November 2019.
- 25) La Via Campesina: "Decision of the European Court of Justice on new GMOs: a historic victory for peasants and citizens of the EU", <https://viacampesina.org/en/decision-of-the-european-court-of-justice-on-new-gmos-a-historic-victory-for-peasants-and-citizens-of-the-eu/>, published 26 July 2018.
- 26) Landworkers' Alliance: „Join us for the Farming, Food and Climate Justice March, 5th October, London“, <https://landworkersalliance.org.uk/climate-justice-march-october-5th-2019/>, last access: 22 November 2019.
- 27) Landworkers' Alliance: "Making Food Sovereignty a Reality. Recommendations for Post-Brexit Agricultural Policy", <https://landworkersalliance.org.uk/wp-content/uploads/2018/10/postbrexagpol.pdf>, published: 2018.
- 28) National Farmers' Union (NFU): "New Breeding Techniques - what are NBTs and why do they matter?", <https://www.nfuonline.com/cross-sector/science-and-technology/crop-protection/crop-protection/new-breeding-techniques/>, last edited: 17 March 2016.
- 29) National Farmers' Union (NFU): "NFU plant health strategy and roadmap - crop protection challenges", <https://www.nfuonline.com/sectors/crops/crops-must-read/nfu-plant-health-strategy-and-roadmap-crop-protection-challenges/>, last edited: 27 August 2019.
- 30) Organic Farmers & Growers (OF&G): <https://twitter.com/i/web/status/1174943111266488321>, published: 20 September 2019.
- 31) Organic food federation: "Frequently Asked Questions", <http://www.orgfoodfed.com/fqs/>, last access: 22 November 2019.
- 32) Soil association: "GM 2.0: Gene Editing and New Plant Breeding Techniques, Soil Association Policy Investigation", <https://www.soilassociation.org/media/15664/gm-20-policy-briefing.pdf>, published: May 2018.
- 33) Testbiotech: "Am I Regulated? The US example: why new methods of genetically engineering crop plants need to be regulated",

[https://www.testbiotech.org/sites/default/files/Am\\_I\\_Regulated\\_en\\_n.pdf](https://www.testbiotech.org/sites/default/files/Am_I_Regulated_en_n.pdf), published: March 2019.

- 34) Various organizations and scientists (from Germany, UK and other European countries): "Neue Züchtungsverfahren - Genome Editing - Offener Brief", <https://www.biotech-gm-food.com/NBTs-EuGH-kommissionpraesident-juncker-brief>, published: 18 July 2018.
