# Supplementary material
Source: MDPI journal article supplement (https://www.mdpi.com/2071-1050/12/1/144)
Supplement: s1 [file s1]

**Supplementary Material 1: Agricultural structure in the districts of Kitzingen, Lüchow-Dannenberg, and Oberhavel**

|                                                                                        | <b>Kitzingen</b> | <b>Lüchow-Dannenberg</b> | <b>Oberhavel</b> | <b>German average</b> |
|----------------------------------------------------------------------------------------|------------------|--------------------------|------------------|-----------------------|
| <b>Agricultural land as a percentage of land area</b>                                  | 60               | 50                       | 40               | 45                    |
| <b>Arable land as a percentage of agricultural land</b>                                | 80               | 80                       | 70               | 70                    |
| <b>Average farm size in 2007 (ha.)</b>                                                 | 20               | 80                       | 150              | 50                    |
| <b>Family (non-corporate) farms as a percentage of the total number of farms</b>       | 96               | 93                       | 78               | 94                    |
| <b>Area of family (non-corporate) farms as a percentage of total agricultural land</b> | 86               | 88                       | 28               | 68                    |
| <b>Number of organic farms as a percentage of the total number of farms</b>            | 3                | 10                       | 8                | 6                     |
| <b>Area of organic farms as a percentage of total agricultural land</b>                | 2                | 9                        | 8                | 6                     |

Numbers are rounded for ease of comparison. Unless otherwise shown, data refers to the years 2005–2012.
